# Supplementary material for: Characterization and Homology Modeling of Catalytically Active Recombinant PhaCAp Protein from Arthrospira platensis
Source: MDPI journal article supplement (doi:10.3390/biology12050751), 2023-05-20
Supplement: s1 [file s1]

# Supplementary Materials for “Characterization and Homology Modeling of Catalytically Active Recombinant PhaC<sub>Ap</sub> Protein from *Arthrospira platensis*”

Chanchanok Duangsri <sup>1</sup>, Tiina A. Salminen <sup>2</sup>, Marion Alix <sup>2</sup>, Sarawan Kaewmongkol <sup>1</sup>, Nattaphong Akrimajirachoote <sup>3</sup>, Wanthanee Khetkorn <sup>4</sup>, Sathaporn Jittapalapong <sup>1</sup>, Pirkko Mäenpää <sup>5</sup>, Aran Incharoensakdi <sup>6,7</sup>, Wuttinun Raksajit <sup>1,\*</sup>

<sup>1</sup> Program of Animal Health Technology, Faculty of Veterinary Technology, Kasetsart University, Bangkok 10900, Thailand; fvetspj@ku.ac.th (S.J.)

<sup>2</sup> Structural Bioinformatics Laboratory and InFLAMES Research Flagship Center, Biochemistry, Faculty of Science and Engineering, Åbo Akademi University, 20520 Turku, Finland

<sup>3</sup> Department of Physiology, Faculty of Veterinary Medicine, Kasetsart University, Bangkok 10900, Thailand

<sup>4</sup> Division of Biology, Faculty of Science and Technology, Rajamangala University of Technology Thanyaburi (RMUTT), Thanyaburi, Pathumthani 12110, Thailand

<sup>5</sup> Faculty of Technology, University of Turku, 20014 Turku, Finland

<sup>6</sup> Laboratory of Cyanobacterial Biotechnology, Department of Biochemistry, Faculty of Science, Chulalongkorn University, Bangkok 10330, Thailand

<sup>7</sup> Academy of Science, Royal Society of Thailand, Bangkok 10300, Thailand

\* Correspondence: cvtwnr@ku.ac.th

**This file includes:**

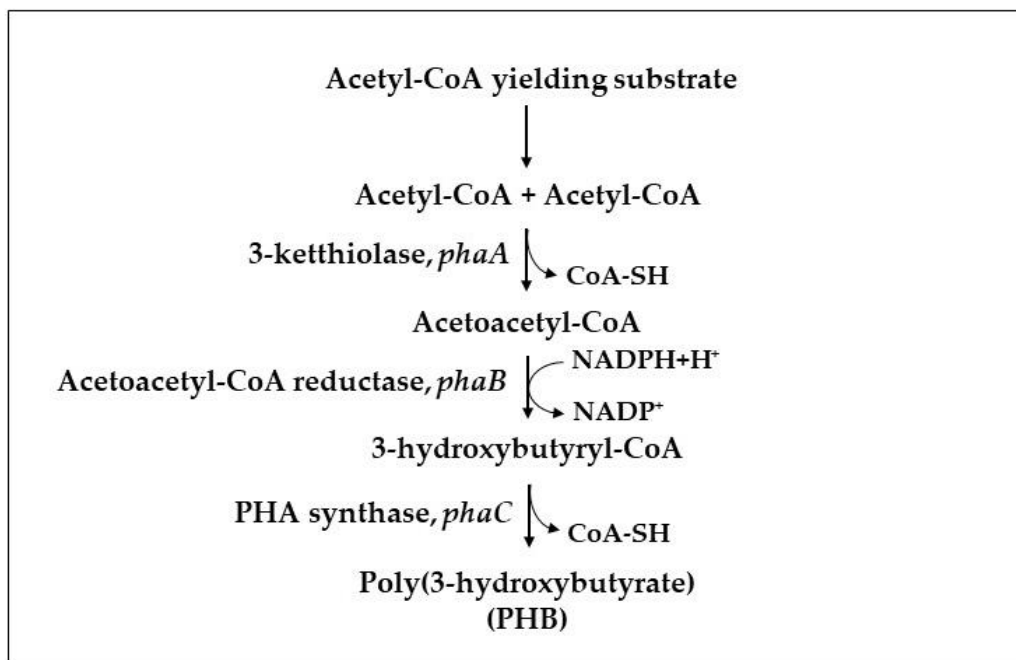

**Figure S1.** PHB Biosynthetic pathway in cyanobacteria (modified from Singh et al. 2017)
